# Supplementary material for: Sub-milliSievert ultralow-dose CT colonography with iterative model reconstruction technique
Source: PeerJ. 2016 Mar 31;4:e1883. doi: 10.7717/peerj.1883 (PMC4824919; doi:10.7717/peerj.1883)
Supplement: Supplemental Information 1 — Here, the de-identified and annotated raw numbers used for the statistical evaluation are provided. [file peerj-04-1883-s001.xlsx]

## Sheet: colon length
	Colon length
		supine length	prone length
		82	160
		82	160
		145	146
		164	163
		180	173
		166	150
		174	160
		142	154
		181	159
		116	132
		182	124
		131	159
		156	164
		157	137
		162	100
		152	182
		177	171
		129	163
		154	140
		146	193
		156	164
		156	158
		160	160
		188	187
		144	141
		165	184
		149	126
		162	164
		209	204
		171	196
		144	141
		174	149
		139	145
		146	147
		202	186
		163	167
		166	179
		157	218
		82	73
		136	137
		126	158
		135	133
		193	172
		147	154
		102	101
		223	224
		136	130
		168	174
		175	163
		156	152
		165	170
		156	157
		192	206
		147	125
		169	170
		171	163
		174	170
		98	100
		130	128
		137	142
		141	167
		110	152
		161	178
		173	160

## Sheet: colon distension
			Colon distension
			R	S	D	T	A	C				R	S	D	T	A	C
			Distension supine									Distension prone
			2	3	2	2	1	2				1	2	2	4	1	1
			3	3	2	1	1	1				2	4	3	2	1	1
			2	3	1	1	1	1				2	3	2	1	1	1
			3	3	4	5	5	5				4	2	3	3	4	4
			3	4	2	1	1	1				3	4	2	2	1	1
			2	3	2	1	1	1				1	3	2	5	1	1
			1	3	2	1	1	1				1	3	2	2	1	1
			1	2	1	1	1	1				1	2	1	1	1	1
			5	5	3	1	1	1				1	3	2	2	1	1
			2	3	2	1	1	1				2	3	2	2	1	1
			2	3	2	1	1	1				1	4	3	3	1	1
			5	3	2	1	1	1				3	2	3	1	1	1
			1	2	1	1	1	1				3	1	2	1	1	2
			1	3	1	1	1	1				1	2	2	1	1	1
			3	2	1	1	1	1				1	2	2	2	1	1
			1	1	1	1	2	1				2	3	1	3	3	1
			1	2	2	1	1	1				1	2	2	1	1	1
			1	3	1	1	1	1				1	2	1	1	1	1
			1	2	1	1	1	1				1	2	1	1	1	1
			3	3	5	1	2	1				2	4	2	1	1	1
			1	5	1	1	1	1				1	2	1	1	1	1
			1	3	1	1	1	1				1	3	1	1	1	1
			4	2	2	2	1	1				1	2	2	1	1	1
			2	2	1	1	1	1				1	3	1	1	1	1
			2	1	2	1	1	1				1	2	2	1	1	1
			3	3	2	1	1	1				2	3	2	1	1	1
			3	4	3	1	1	1				1	4	3	2	1	1
			2	2	1	1	1	1				1	2	1	1	1	1
			1	2	1	1	1	1				1	2	1	3	1	1
			3	2	2	1	1	1				1	3	3	1	1	1
			1	2	1	1	1	1				1	3	2	3	2	1
			2	5	1	1	1	1				1	2	2	3	1	1
			1	4	4	1	1	1				1	4	4	2	1	1
			2	4	2	2	2	2				2	4	2	2	2	2
			3	3	3	2	1	1				2	3	3	3	2	1
			2	3	2	2	1	1				1	3	2	1	1	1
			2	5	3	1	1	1				4	5	3	1	1	1
			2	4	2	2	1	1				2	3	2	2	1	1
			5	2	2	1	5	5				2	4	3	4	5	5
			5	1	1	1	1	1				3	1	1	1	1	1
			3	3	2	1	1	1				2	3	3	2	1	1
			1	2	2	1	1	1				1	2	2	1	1	1
			2	2	1	1	1	1				2	3	1	3	1	1
			1	1	1	1	1	1				1	1	1	1	1	1
			2	5	2	3	2	2				1	2	5	5	3	1
			1	1	1	1	1	1				1	1	1	1	1	1
			1	4	2	2	1	1				1	4	2	3	3	1
			3	3	2	1	1	1				1	3	3	1	1	1
			1	4	3	1	1	1				1	4	3	1	1	1
			1	3	2	1	1	1				1	3	2	5	1	1
			1	3	2	1	1	1				1	3	2	1	1	1
			1	2	1	1	1	1				1	1	1	1	1	1
			2	3	2	1	1	1				1	3	2	3	1	1
			1	3	2	1	1	1				1	2	2	3	1	1
			1	2	3	1	1	1				1	2	2	1	1	1
			1	4	3	1	1	1				1	3	3	1	1	1
			2	3	3	4	1	1				1	3	3	2	1	1
			1	2	2	1	1	1				1	2	2	2	1	2
			1	4	3	1	1	1				2	4	2	2	1	1
			1	5	3	1	1	1				1	3	2	1	1	1
			3	3	4	1	1	1				1	3	3	1	1	1
			2	2	2	1	1	1				1	3	2	5	1	1
			2	4	4	2	1	1				2	3	3	2	1	1
			1	1	2	1	1	1				1	1	2	1	1	1

## Sheet: image quality adrenal
		image quality left adrenal
		IMR HI	HIR HI	FBP HI	IMR LO	HIR LO	FBP LO
		1	2	3	3	4	4
		1	1	2	3	4	5
		1	2	2	2	3	4
		1	1	2	2	3	5
		1	2	3	2	4	4
		1	2	3	2	3	5
		1	2	3	2	2	4
		1	2	2	2	4	5
		1	1	1	2	2	4
		1	2	3	2	3	3
		1	2	3	2	3	4
		1	2	3	1	3	4
		1	2	2	2	4	5
		1	2	4	2	5	5
		1	2	3	2	3	3
		1	2	2	2	2	4
		1	2	2	1	3	4
		1	2	3	2	3	4
		1	2	2	2	2	4
		1	2	3	2	4	5
		1	2	1	3	3	5
		1	2	3	2	3	5
		1	1	2	2	4	5
		1	2	3	3	4	5
		1	2	3	2	3	3
		1	2	3	2	3	5
		1	2	3	1	3	5
		1	3	1	3	2	4
		1	2	2	2	3	3
		1	2	4	2	3	4
		1	2	3	2	3	4
		1	2	3	2	2	3
		1	1	1	1	3	5
		1	2	3	3	3	5
		1	3	3	2	3	5
		1	2	3	3	3	5
		1	2	3	2	4	3
		1	1	2	2	4	5
		1	2	3	3	5	4
		1	2	3	3	4	5
		2	3	3	2	3	5
		1	2	2	3	3	4
		1	2	2	2	3	5
		1	2	3	1	3	3
		2	3	4	2	3	3
		1	1	2	3	3	4
		1	3	3	3	3	4
		2	2	3	3	3	5
		1	2	3	2	3	3
		1	2	3	2	4	5
		1	2	3	2	4	4
		1	1	1	3	4	5
		1	2	1	3	3	5
		1	1	2	2	3	3
		1	2	3	2	3	4
		1	2	3	2	2	4
		1	1	2	1	2	4
		1	2	3	1	3	5
		1	3	3	2	3	5
		1	2	3	2	4	4
		1	2	3	4	4	4
		1	2	3	2	3	3
		1	1	3	3	3	5
		1	2	3	3	3	5

## Sheet: CAD marks
																CAD MARKS
		True positives														True positives							All							False positives
		MBIR HI	HIR HI	FBP HI	MBIR LO	HIR LO	FBP LO									MBIR HI	HIR HI	FBP HI	MBIR LO	HIR LO	FBP LO		MBIR HI	HIR HI	FBP HI	MBIR LO	HIR LO	FBP LO		MBIR HI	HIR HI	FBP HI	MBIR LO	HIR LO	FBP LO
		2	2	2	3	3	3									2	2	2	3	3	3		7	8	5	7	6	4		5	6	3	4	3	1
		2	2	2	1	1	1									2	2	2	1	1	1		4	3	5	1	4	6		2	1	3	0	3	5
		2	2	2	1	2	0									2	2	2	1	2	0		8	5	6	3	4	5		6	3	4	2	2	5
		2	2	2	2	2	2									2	2	2	2	2	2		12	9	9	12	11	8		10	7	7	10	9	6
		1	1	1	0	1	3									1	1	1	0	1	3		10	11	10	11	11	11		9	10	9	11	10	8
		0	0	0	0	0	0									0	0	0	0	0	0		3	4	5	3	3	2		3	4	5	3	3	2
		0	1	0	0	1	2									0	1	0	0	1	2		9	9	8	6	6	7		9	8	8	6	5	5
		1	0	0	0	0	2									1	0	0	0	0	2		3	2	4	3	5	7		2	2	4	3	5	5
		1	1	0	2	2	0									1	1	0	2	2	0		9	6	9	6	3	2		8	5	9	4	1	2
		1	1	1	1	1	0									1	1	1	1	1	0		3	1	3	4	3	2		2	0	2	3	2	2
		3	3	4	4	4	4									3	3	4	4	4	4		11	6	8	10	10	8		8	3	4	6	6	4
		1	1	1	1	1	1									1	1	1	1	1	1		9	7	8	9	9	6		8	6	7	8	8	5
		4	4	4	4	4	4									4	4	4	4	4	4		10	8	11	4	7	11		6	4	7	0	3	7
		2	2	2	3	3	4									2	2	2	3	3	4		8	5	7	4	8	4		6	3	5	1	5	0
		1	1	1	1	1	1									1	1	1	1	1	1		4	12	11	6	9	3		3	11	10	5	8	2
		1	1	1	1	1	1									1	1	1	1	1	1		15	13	10	12	14	8		14	12	9	11	13	7
		2	2	2	2	2	2									2	2	2	2	2	2		22	22	15	17	17	7		20	20	13	15	15	5
		0	0	0	0	0	0									0	0	0	0	0	0		5	4	7	4	3	3		5	4	7	4	3	3
		2	2	2	2	2	2									2	2	2	2	2	2		10	7	8	9	9	7		8	5	6	7	7	5
		3	3	3	2	2	2									3	3	3	2	2	2		13	9	10	9	10	10		10	6	7	7	8	8
		4	4	4	4	4	4									4	4	4	4	4	4		8	11	9	10	10	11		4	7	5	6	6	7
		2	0	0	2	2	1									2	0	0	2	2	1		7	4	5	5	6	2		5	4	5	3	4	1
		2	2	2	1	2	2									2	2	2	1	2	2		5	5	6	5	5	6		3	3	4	4	3	4
		0	0	0	0	0	0									0	0	0	0	0	0		4	5	5	5	5	7		4	5	5	5	5	7
		0	0	0	0	0	0									0	0	0	0	0	0		1	2	6	2	4	1		1	2	6	2	4	1
		0	0	0	0	0	0									0	0	0	0	0	0		2	3	2	3	3	4		2	3	2	3	3	4
		0	0	0	0	0	0									0	0	0	0	0	0		2	2	1	2	3	12		2	2	1	2	3	12
		5	5	5	5	5	3									5	5	5	5	5	3		12	15	15	11	9	8		7	10	10	6	4	5
		0	0	0	0	0	0									0	0	0	0	0	0		3	2	3	5	2	1		3	2	3	5	2	1
		0	0	0	0	0	0									0	0	0	0	0	0		2	1	1	3	6	3		2	1	1	3	6	3
		0	0	0	0	0	0									0	0	0	0	0	0		3	6	6	4	5	2		3	6	6	4	5	2
		0	0	0	0	0	0									0	0	0	0	0	0		8	10	8	5	1	4		8	10	8	5	1	4
		0	0	0	0	0	0									0	0	0	0	0	0		7	8	7	11	8	8		7	8	7	11	8	8
		0	0	0	0	0	0									0	0	0	0	0	0		1	2	1	11	1	1		1	2	1	11	1	1
		0	0	0	0	0	0									0	0	0	0	0	0		6	3	5	2	2	2		6	3	5	2	2	2
		0	0	0	0	0	0									0	0	0	0	0	0		1	2	2	1	0	0		1	2	2	1	0	0
		0	0	0	0	0	0									0	0	0	0	0	0		2	4	4	4	1	3		2	4	4	4	1	3
		0	0	0	0	0	0									0	0	0	0	0	0		4	3	4	4	6	4		4	3	4	4	6	4
		0	0	0	0	0	0									0	0	0	0	0	0		6	5	3	4	2	0		6	5	3	4	2	0
		0	0	0	0	0	0									0	0	0	0	0	0		1	1	2	1	2	2		1	1	2	1	2	2
		0	0	0	0	0	0									0	0	0	0	0	0		6	3	4	5	2	4		6	3	4	5	2	4
		0	0	0	0	0	0									0	0	0	0	0	0		10	5	5	9	9	7		10	5	5	9	9	7
		0	0	0	0	0	0									0	0	0	0	0	0		3	3	3	3	2	4		3	3	3	3	2	4
		0	0	0	0	0	0									0	0	0	0	0	0		6	6	5	7	5	7		6	6	5	7	5	7
		0	0	0	0	1	1									0	0	0	0	1	1		23	19	21	16	11	15		23	19	21	16	10	14
		1	1	1	1	1	0									1	1	1	1	1	0		6	5	4	6	4	4		5	4	3	5	3	4
		0	0	0	0	0	0									0	0	0	0	0	0		2	4	2	2	3	2		2	4	2	2	3	2
		1	1	1	1	1	1									1	1	1	1	1	1		8	10	8	13	9	9		7	9	7	12	8	8
		0	0	0	0	0	1									0	0	0	0	0	1		1	2	3	1	3	3		1	2	3	1	3	2
		0	0	0	0	0	0									0	0	0	0	0	0		5	1	3	5	2	6		5	1	3	5	2	6
		0	0	0	0	0	0									0	0	0	0	0	0		4	5	7	3	4	3		4	5	7	3	4	3
		0	0	0	0	0	0									0	0	0	0	0	0		9	10	10	4	5	5		9	10	10	4	5	5
		0	0	0	0	0	0									0	0	0	0	0	0		6	10	7	4	5	4		6	10	7	4	5	4
		0	0	0	0	0	0									0	0	0	0	0	0		3	2	2	5	6	6		3	2	2	5	6	6
		0	0	0	0	0	1									0	0	0	0	0	1		7	6	7	4	6	3		7	6	7	4	6	2
		0	0	0	0	0	0									0	0	0	0	0	0		8	4	10	6	6	9		8	4	10	6	6	9
		0	0	0	0	0	0									0	0	0	0	0	0		4	3	0	3	2	3		4	3	0	3	2	3
		1	1	0	1	1	1									1	1	0	1	1	1		3	4	1	2	4	4		2	3	1	1	3	3

## Sheet: preferred threshold
		Preferred endoluminal rendering threshold
		IMR HI	IDOSE HI	FBP HI		IMR LO	IDOSE LO	FBP LO
		-744	-744	-744		-653	-744	-706
		-744	-744	-701		-744	-675	-609
		-744	-744	-744		-744	-744	-600
		-744	-744	-744		-744	-744	-602
		-722	-708	-710		-744	-701	-608
		-728	-716	-693		-744	-701	-615
		-744	-744	-744		-744	-744	-676
		-744	-744	-744		-716	-744	-603
		-718	-714	-648		-744	-671	-637
		-744	-744	-744		-703	-656	-600
		-744	-744	-744		-744	-744	-625
		-744	-744	-744		-744	-704	-605
		-744	-744	-744		-744	-744	-608
		-709	-711	-620		-744	-683	-600
		-744	-744	-744		-714	-744	-610
		-744	-744	-744		-744	-696	-600
		-744	-744	-744		-744	-744	-672
		-744	-737	-744		-744	-744	-630
		-744	-744	-744		-744	-692	-656
		-744	-744	-744		-744	-719	-685
		-744	-744	-744		-741	-744	-600
		-744	-744	-744		-744	-744	-630
		-744	-744	-744		-706	-722	-610
		-720	-702	-691		-657	-605	-600
		-744	-744	-744		-744	-744	-677
		-744	-744	-744		-713	-697	-600
		-744	-744	-744		-675	-672	-608
		-744	-744	-744		-744	-744	-625
		-744	-744	-744		-744	-744	-601
		-744	-744	-744		-744	-744	-614
		-744	-744	-744		-701	-630	-605
		-744	-744	-744		-744	-744	-644
		-744	-744	-744		-744	-744	-606
		-744	-744	-744		-708	-718	-600
		-744	-744	-744		-744	-744	-618
		-744	-744	-744		-744	-744	-609
		-744	-744	-744		-744	-744	-621
		-716	-726	-623		-730	-692	-600
		-744	-744	-744		-744	-715	-652
		-744	-744	-744		-744	-744	-625
		-744	-744	-744		-744	-744	-619
		-744	-744	-744		-694	-700	-627
		-744	-744	-744		-744	-744	-665
		-744	-744	-744		-744	-744	-606
		-744	-744	-744		-744	-744	-638
		-744	-744	-744		-744	-744	-634
		-744	-744	-744		-744	-744	-608
		-744	-744	-744		-744	-744	-600
		-744	-744	-744		-744	-744	-659
		-726	-744	-685		-693	-609	-601
		-744	-744	-744		-744	-721	-664
		-744	-733	-715		-682	-678	-600
		-744	-744	-744		-744	-744	-610
		-744	-744	-744		-744	-744	-652
		-744	-744	-744		-744	-706	-605
		-744	-744	-744		-744	-744	-653
		-744	-744	-744		-744	-744	-651
		-744	-744	-744		-744	-731	-602
		-744	-744	-744		-744	-744	-689
		-744	-744	-744		-744	-744	-701
		-744	-744	-744		-744	-701	-601
		-744	-744	-744		-744	-744	-628
		-744	-744	-744		-744	-744	-609
		-744	-744	-744		-693	-744	-603

## Sheet: image quality endoluminal
			Image quality endoluminal view
			IMR HI								IDOSE HI								FBP HI								IMR LO								IDOSE LO								FBP LO
			R	S	D	T	A	C			R	S	D	T	A	C			R	S	D	T	A	C			R	S	D	T	A	C			R	S	D	T	A	C			R	S	D	T	A	C
			Rectum	Sigmoid	Descending	Transverse	Ascending	Caecum
			1	2	1	1	1	1			1	1	1	1	1	1			1	1	1	1	1	1			1	1.5	x	2	2	2			1	1	1	1	1	1			3	3	2	2	1.5	2
			1	1	2	1	1	1			1	1	1	1	1	1			1	1	1	1	1	2			2	2	1	1.5	2	1			2	2	1	1	1	1			4.5	3	3	3	3	3
			1	1	2	2	1	1			1	1	1	1	1	1			1	1	1	1	1	1			2	1	1	1	1	1			2	2	2	1	1	1			3	3	3	2.5	2	3
			1	1	1	1	1	1			1	1	1	1	1	1			1	1	1	1	1	2			1.5	2	1	1	1	1.5			1	1	1	1	1	1			3	3	2	1	2	2.5
			1	1	1	2	1	1			1	1	1	1	1	1			2.5	1	1	1	1	1			2	1.5	1	1	1	1.5			2	1.5	1	1	1	1			5	4	3	2	2	3
			1	1	1	1	1	1			1	1	1	1	1	1			1.5	1	1	1	1	1			2	2	2	1	1	1			3	3	1	1	1	1			5	3	3	2	3	3
			1	1	1	1	1.5	1.5			1	1	1	1	1	1			1	1	1	1	1	1			2	1.5	1	1	1	1			1	1	1	1	1	1			2.5	3.5	2	1	1	2
			2	1	1	1	1	1			2	1	1	1	1	1			3	1	1	1	1	1			2	1	2	2	2	2			1	1	1	1	1	1			4	3.5	3	1	2	3.5
			1.5	1	1.5	1.5	1	2			1	1	1	1	1	1			2	1	1	1	1	1			2	2	1	1	1	2			2	1	2	1	1	2			4	4	3	2	2	3
			1	1	1	1	1	1			1	1	1	1	1	1			2	1	1	1	1	1			2	2	1	1	2	2			2.5	1	1	1	1	1			4.5	4	3	2	2	4.5
			1	1	1	1	1	1			1	1	1	1	1	1			1.5	1	1	1	1	1			2	1	1	1	1	1			1.5	1	1	1	1	1			1.5	2.5	3	3.5	3	3
			1	1	1	1	1	1			1	1	1	1	1	1			1	1	1	1	1	1			2	2	1	1	1	1			2	1	1	1	1	1			4	3	1	1	2	2
			1	1	1	1	1	2			1	1	1	1	1	1			2.5	1	1	1	1	1			2	2	2	2	2	2			2	1	1	1	1	1			3.5	2	2	2	2	2
			2	2	1	1	1	2			1	1	1	1	1	1			2.5	1	1	1	1	1.5			3	2	2	1.5	2	2			3	3	2	1	1	2			5	4.5	3	3	3	3.5
			1	1	2	1	1	1			1	1	1	1	1	1			1	1	1	1	1	1			1	1	1	1	2	2			1	1	1	1	1	1			3	2	2	1	2	2
			2	2	1	1	1	2			1	1	1	1	1	1			2	1	1	1	1	1			3	2	1	1	2	2			2	1	1	1	1	1			5	3.5	2	1	2	2
			1	1	1	1	x	x			1	1	1	1	x	x			1	1	1	1	x	x			1	1	2	1	1	1			2	1	1	1	x	x			4	3	3	3	x	x
			1	1	1	1	1	1			1	1	1	1	1	1			1.5	1	1	1	1	1			2	1	2	1	1	1			2	2	2	1	1	2			4	3	3	3	3	4
			1	1	1	1	1	1			1	1	1	1	1	1			1	1	1	1	1	1			2	2	1	1	1	2			2	1	1	1	1	1			4	3	2	2	2	3
			1	1	1	1	1	1			1	1	1	1	1	1			1	1	1	1	1	1			2	1	2	1	1.5	2			2	1.5	1	1	1	1			4	4	3	2	2	2
			1	1	1	1	1	1			1	1	1	1	1	1			1	1	1	1	1	1			2	1	2	1	1	1.5			1	1	1	1	1	1			4	3.5	3	1.5	1	2
			1	1	1	1	2	2			1	1	1	1	1	1			1	1	1	1	1	2			1.5	1	1	2	2	2			2	1	1	1	2	2			3	3	3	1	2	2
			1	1	1	1	1	1			1	1	1	1	1	1			1	1	1	1	1	1			2	2	1	1	1	2			2	1.5	1	1	1	1			5	4	3	3	3	4
			2	1	1	1	1.5	2			1	1	1	1	1	1			1	1	1	1	1	2			3	3	3	2	2	2.5			2.5	2.5	2	2	2	3			5	5	4	3.5	3.5	4.5
			1	1	1	1	1	2			1	1	1	1	1	1			1	1	1	1	1	1			1	2	2	2	1	1.5			1	1	2	1	1	1			3	2	2	1	1	2
			1	1	1	1	1	1.5			1	1	1	1	1	1			1.5	1	1	1	1	1			2	1	2	2	2	2			2	1	1	1	1	1			5	4	3.5	3	3	3
			1	1	1	1	1	1			1	1	1	1	1	1			1	1	1	1	1	1			2	1	1	1	1	1			2	1	1	1	1	1			4	3	3	2	2.5	2
			1	1	1.5	1	1	1			1	1	1	1	1	1			2	1	1	1	1	1			2	2	1	1	2	2			2	2	1	1	1	1			4	3.5	2.5	2	1.5	3
			1	1	1	1	1	1			1	1	1	1	1	1			1	1	1	1	1	1			2	2	1	1	2	2			1	1	1	1	1	1			3.5	4	3	1.5	2	3
			1	1	1	1	1	1			1	1	1	1	1	1			2	1	1	1	1	1			1.5	2	1	1	1	1			1	1	1	1	1	1			3	2	1	1	1	1.5
			1	1	1	1	1	1			1	1	1	1	1	1			1	1	1	1	1	1			2	1.5	1	1	1	2			2.5	1.5	1	1	1	1			4	3.5	4	2	3.5	3
			1	1	1	1	1	1			1	1	1	1	1	1			1	1	1	1	1	1			2	1	2	1	1	1			1	1	1	1	1	1			3	3	2	1	2	3
			1	1	1	1	1	1			1	1	1	1	1	1			1	1	1	1	1	1			1	1	2	1.5	1	1			2	2	1.5	1	1	2			3	2.5	2	1.5	2	3
			1	1	1.5	1	1.5	1			1	1	1	1	1	1			1.5	1	1	1	1	1			2.5	1.5	1.5	1.5	2	2			3	2	2	2	2	2			4.5	3.5	4	3	3	3
			1	1	1	1	1	1			1	1	1	1	1	1			1.5	1	1	1	1	1			1.5	1	1	1	1	1			1	1	1	1	1	1			3	2	3	3	2	2
			1	1	1	1	1	1			1	1	1	1	1	1			1.5	1	1	1	1	1			1	2	2	1	1	2			2	1	1	1	1	1			4	4	3	3	3	3
			1	1	1	1	1	1			1	1	1	1	1	1			1	1	1	1	1	1			2	1	1	1	1	1			1	1	1	1	1	1			3	2	2	1	2	2.5
			2	1	1.5	1	1	1			1.5	1	1	1	1	1			2	1	1	1	1	1			3	2.5	2.5	2	2	2.5			3	2	1	1	1	2			4.5	3	3	3	3	3
			1	1	1	1	1	1			1	1	1	1	1	1			1	1	1	1	1	1			2	1	2	1	1	1			1	1	1	1	1	1			3	2	1	1	1	2
			1	1	1	1	1	1			1	1	1	1	1	1			1	1	1	1	1	1			2	1	1	1	1.5	2			2	2	1	1	1	2			4.5	4	4	3	3	4
			1	1	1	1	1	1			1	1	1	1	1	1			1	1	1	1	1	1			2	2	1	1	2	2			2	1	1	1	1	2			4	3	2.5	2	2	3
			1	1	1	1	1	1			1	1	1	1	1	1			1	1	1	1	1	2			2	2	1	1	1	2			2	2	1	1	1	1			5	3	3	2	2	3
			1	1	1	1	1	1			1	1	1	1	1	1			1	1	1	1	1	1			1	1.5	1.5	1	1	1			2	1	1	1	1	1			2	2	1	1	1	1
			1	1	1	1	1	1			1	1	1	1	1	1			1	1	1	1	1	1			1	1	1	1	1	1			1	1	1	1	1	1			3	2.5	2	1.5	2	2
			1	1	1	1	1	1			1	1	1	1	1	1			1.5	1	1	1	1	1			1	1	2	1.5	1	1			2	1	1	1	1	1			3	3	2	1.5	3	2
			1	1	1	1	1	1			1	1	1	1	1	1			1	1	1	1	1	1			2	2	2	1	1	1.5			2	2	2	1	2	2			3.5	3	3	2	3	3
			1	1	1	1	1	1			1	1	1	1	1	1			1.5	1	1	1	1	1			2	2	1	2	2	2			2	1	1	1	1	1			4	3	2	2	1.5	2
			1	1	1	1	1	2			1	1	1	1	1	1			3	2.5	1	1	1	1			3	2	2	2	2	2			2.5	1	1	1	1	2			5	5	4	2.5	4	4
			1.5	1	1	1	1	1			1	1	1	1	1	1			1.5	1	1	1	1	1			2	1.5	1.5	1.5	1.5	1.5			1	1	1	1	1	1			4	3	2.5	2	1.5	1
			1.5	1	1	1	1	1			1	1	1	1	1	1			3	1	1	1	1	1			3	1	1	1	1	1			3	3	2	1	1	1			3.5	2.5	2	2	1.5	1.5
			2	1	1	1	1	1			1.5	1	1	1	1	1			2	1	1	1	1	1			2	1	1	1	1	1			3	1	1	1	1	1			4	2	2	1	2	2
			1	1	1.5	1	1	1			1	1	1	1	1	1			2	1.5	1	1	1	1			2.5	1.5	2	2	2	1			3	2	1	2	2	2			4.5	5	4	2.5	3.5	3.5
			1	1	1	1	1	1.5			1	1	1	1	1	1			1	1	1	1	1	1.5			2	2	1	1	1	2			2	2	1	1	1	1			4	4	3	2.5	3	2.5
			1.5	1	1.5	1	1	1.5			1	1	1	1	1	1			2	1	1	1	1	1			2	2	1	1	1	2			1	1	1	1	1	1			3	3	3	2	2	3
			1	1	1	1	1	1			1	1	1	1	1	1			1	1	1	1	1	1			2	1	2	1	2	2			2	2	1	1	1	1			4	3	2	2	2	3
			1	1	1	2	1	1			1	1	1	1	1	1			1	1	1	1	1	1			1	1	1.5	2	2	1			1	1	1	1	1	1			3	3	2	2.5	2	2
			1	1	1	1	1	1			1	1	1	1	1	1			1	1	1	1	1	1			1	1	1	1	1	1			1	1	1	1	1	1			3	3	2	1	2	2
			1	1	1	1	1	1			1	1	1	1	1	1			1	1	1	1	1	1			2	2	2	1	1	1.5			1	1	1	1	1	1			3	2	1	2	2	2
			1	1	2	1	1	1			1	1	1	1	1	1			1	1	1	1	1	1			2	1	1	1	1	1			1	2	1	1	1	2			3	2.5	2	1.5	1	2
			1.5	1	1.5	1.5	1	1			1	1	1	1.5	1	1			2	2	1	1.5	1	1			2	2	1	1	1	2			2	1	1	1	1	1			3	2	1	1	1	2
			1	1	1	1	1	1			1	1	1	1	1	1			2	1	1	1	1	1			2	2	2	2	3	2			3	2	2	1.5	2	2			5	5	3	3	3.5	4.5
			1	1	1	1	1	1			1	1	1	1	1	1			1.5	2	1	1	1	1			2	1.5	1	1	1	1			1.5	1	1	1	1	1			4	3	2	1	1.5	2
			1	1	1	1	1	1.5			1	1	1	1	1	1			1	1	1	1	1	2			2	2	1	2	1	2			1	1	1	1	1	1			2	2	3.5	3	3	3
			1	1	1	1	1	1			1	1	1	1	1	1			1	2	1.5	1	1	1			2	3	2	1	2	2			2	1.5	1	1	1	2			1	1	3	3	2	2

## Sheet: Image quality cross-sectional
			Image quality cross-sectional view
			IMR HI								IDOSE HI								FBP HI								IMR LO								IDOSE LO								FBP LO
			R	S	D	T	A	C			R	S	D	T	A	C			R	S	D	T	A	C			R	S	D	T	A	C			R	S	D	T	A	C			R	S	D	T	A	C
			Rectum	Sigmoid	Descending	Transverse	Ascending	Caecum
			1	1	1	1	1	1			2	1	1	1	1	1			3	3	3	2	2	2			2	2	1	1.5	1	1			3	2.5	2	2	2	3			3	3	3	3	3	3
			1	1	1	1	1	1			1	1	1	1	1	1			1	1	1	1	1	1			2	1	1	1	1	1			2.5	2	2	1	1	2			5	5	4	4	4	4
			1	1	1	1	1	1			1	1	1	1	1	1			2.5	2.5	1	1	1	1			2	1.5	1	1	1	1			2	2	1	1	1	2			5	4	3	3	3	4
			1	1	1	1	1	1			1	1	1	1	1	1			3	2.5	2	1	1	2			1.5	1.5	1	1	1	1			2.5	3	1	1	1	1			4	4	3	3	3	3
			1	1	1	1	1	1			1	2	1	1	1	1			2.5	2	1	1	1	1			2	1	1	1	1	1			3	3	2	1	1	2			5	4	4	3	3	4
			1	1	1	1	1	1			2	1	1	1	1	1			3	1	1	1	1	1			1	1	1	1	1	1			4	2	1	1	1	2			5	4.5	3	3	3	3
			1	1	1	1	1	1			2	1	1	1	1	1			3	2	1	1	1	2			2	1	1	1	1	1			3	3	2	1	1	2			4.5	4.5	3	2	2.5	3.5
			2	1	1	1	1	1			2	1	1	1	1	1			2	1	1	1	1	1			3	2	1	1	1	1			4	2.5	1	1	1	2			5	5	3	3	3	4
			1	1	1	1	1	1			1	1	1	1	1	1			3	2	1	1	1	1			2	2	1	1	1	1.5			3	3	2	1	1	2			5	4	3	3	3	3
			1	1	1	1	1	1			2	1	1	1	1	1			2.5	2	1	1	1	1.5			2	1	1	1	1	1			3.5	2	1	1	1	2			4.5	3.5	3.5	2.5	2.5	3
			1	1	1	1	1	1			2	1	1	1	1	1			3	2	2	1	1	2			2	1	1	1	1	1			3	2.5	1	1	1	2			1	4	4.5	4.5	4.5	4
			1	1	1	1	1	1			1	1	1	1	1	1			2	1.5	1	1	1	1.5			2	2	1	1	1	1			3	3	1	1	1	2			4	4	2	2	2	3
			1	1	1	1	1	1			2	1	1	1	1	1.5			3	3	2	1	2	2			2	1	1	1	1	2			3.5	2.5	1	1	1	2			5	4	4	2	3	3
			1	1	1	1	1	1			2	2	1	1	1	2			4	4	3	2	2	3			2	1.5	1	1	1	1			3	3	3	2	3	3			4	4	3	3	3	3.5
			1	1	1	1	1	1			2	1	1	1	1	1			3	2	2	1	1	2			2	1.5	1	1	1	1			3	2	1	1	1	1			3	3	3	2	2	2
			1	1	1	1	1	1			2	1	1	1	1	1			2	2	1	1	1	1			2	2	1	1	1	2			3	2	1	1	1	2			5	3.5	3	2	2	3
			1	1	1	1	1	1			2	1	1	1	1	1			3	3	2	1.5	2	2			2	1	1	1	1	1			2.5	1	1	1	1	2			5	4.5	3.5	3	4	4
			1	1	1	1	1	1			2	1	1	1	1	1			3	2	1	1	1	2			2	1	1	1	1	1			3	2	1	1	1	2.5			5	4	3	3	3	4
			1	1	1	1	1	1			2	1	1	1	1	1			2	2	1	1	1	1			2	1	1	1	1	1			3	3	2	1	2	2			3	3.5	2.5	3	3.5	3.5
			1	1	1	1	1	1			2	1	1	1	1	1			3	2	1	1	1	1			2	1	1	1	1	1			3	3	2	1	1	2			4	4	3.5	2	2	3
			1	1	1	1	1	1			2	1	1	1	1	1			3	2	1	1	1	2			1.5	2	1	1	1	1			3	3	1	1	1	2			4	4	3	2	2	3
			1	1	1	1	1	1			3	2	1	1	1	1			3	3	1	1	1	2			1	1	1	1	1	1			3	3	3	2	2	2			4	4	4	3	3	4
			1	1	1	1	1	1			2	1	1	1	1	1			3	1	1	1	1	2			2	1	1	1	1	1			3	2	1	1	1	1			5	4	3	2	3	4
			2	1	1	1	1	1			2	1.5	1	1	1	1			3	2	1	1	1	1			3.5	3.5	2	1	2	2.5			3.5	3	2.5	2	2	3			5	4.5	4	3	3.5	4
			1	1	1	1	1	1			2	1	1	1	1	1			3	2	1.5	1	1	2			2	1	1	1	1	1			2.5	1.5	1	1	1	2			3	3	2	2	2	3
			1	1	1	1	1	1			2	2	1	1	1	1			3	3	3	2	2	2			2	1	1	1	1	1			3	3	2	1	1	1.5			5	5	4	3	4	4
			1	1	1	1	1	1			2	1	1	1	1	1			2	1	1	1	1	1			2	1	1	1	1	1			2	2	1	1	1	1			5	4	3	3	3	3
			1	1	1	1	1	1			2	1	1	1	1	1			3	2	1	1	2	2			2	2	1	1	1	2			3	3	1	1	1	2			4	3	3	2	2	3
			1	1	1	1	1	1			2	1	1	1	1	1			3	2	1	1	1	1			1	1	1	1	1	1			3	2.5	2	1	2	2.5			4	4	2.5	2	2	3
			1	1	1	1	1	1			1	1	1	1	1	1			3	2	1	1	1	2			1	1	1	1	1	1			3	3	1.5	1	1	2			4	3.5	2	2	2	3
			1	1	1	1	1	1			2	1	1	1	1	1			3	3	2	1	2	2			3	3	2	1	1	1			4	4	3	2	2	3			5	5	4	3	3	4
			1	1	1	1	1	1			2	1	1	1	1	1			3	2	1	1	1	2			2	1	1	1	1	1			2	1	1	1	1	1			5	4	3	3	3	4
			1	1	1	1	1	1			2	2	1	1	1	1			1	1	1	1	1	1			2	1	1	1	1	1			2.5	2.5	2	1.5	1	2.5			5	4	4	3	3	4
			1	1	1	1	1	1			2	1	1	1	1	1			3	2	1	1	1	1			2.5	2	1	1	1	1			3.5	3	2	1	1.5	2			5	4	3	3	3	4
			1	1	1	1	1	1			2	1	1	1	1	1			3	2	1	1	1	1			2	1	1	1	1	1			3	2	1	1	1	1			4	3	3	2	2	3
			1	1	1	1	1	1			2	1	1	1	1	1			3	2	1	1	1	2			2	1	1	1	1	1			3	2	2	1	1	2			5	4	3.5	3.5	3	4
			1	1	1	1	1	1			2	1	1	1	1	1			3	2	1	1	1	2			1	1	1	1	1	1			3	2	1	1	1	2			4	4	3	3	3	4
			1	1	1	1	1	1			2	2	1	1	1	1			3	2	1	1	1	2			2	1	1	1	1	1			4	3	2	1	1	2			5	4	4	3	3	3
			1	1	1	1	1	1			2	2	1	1	1	1			3	3	2	1	1	2			2	1.5	1	1	1	1			3	3.5	2	1.5	1.5	2			5	5	4	3	3	4
			1	1	1	1	1	1			2	1	1	1	1	1			3	3	2	1	1	2			2	1.5	1	1	1	1.5			3	2	2	1	2	2			5	5	4	4	4	4.5
			1	1	1	1	1	1			2	1	1	1	1	1			2	2	1	1	1	1			2	1.5	1	1	1	2			3	3	1.5	1	1	2			5	4	4	3	3	4
			1	1	1	1	1	1			1	1	1	1	1	1			2	1	1	1	1	1			3	2	1	1	1	1			4	3	2	2	2	2			5	3.5	3	2.5	3	3
			1	1	1	1	1	1			1	1	1	1	1	1			2	2	1	1	1	1			1	1	1	1	1	1			2	2	2	1	1	2			3	4	3	2	2	3
			1	1	1	1	1	1			2	1	1	1	1	1			2.5	2	1	1	1	1			1	1	1	1	1	1			2	1	1	1	1	1			4	3.5	3	3	3	4
			1	1	1	1	1	1			2	1	1	1	1	2			2.5	2	1	1	1	2			2	1	1	1	1	1			4	3	2	2	2	3			3.5	4	3	3	3.5	3.5
			1	1	1	1	1	1			2	1	1	1	1	1			3	2	1	1	1	2			2	1	1	1	1	1			3	3	2	1	1	1.5			5	4	3.5	3	3	3
			1	1	1	1	1	1			1	1	1	1	1	1			3	2	1	1	1	2			2	1.5	1	1	1	1			3	2	1	1	1	2			4.5	4	4	3	3	4
			1	1	1	1	1	1			2	1	1	1	1	1			3	3	2	1	2	2			3	2	1	1	1	1			4	3	2	2	2	3			5	4	4	4	4	4
			1	1	1	1	1	1			2.5	1	1	1	1	1			3	2	1.5	1	1	2			2	1.5	1	1	1	1			3	3	3	2	2	3			4.5	4.5	3.5	3	3	3
			1	1	1	1	1	1			2.5	1	1	1	1	1			2.5	2	1	1	1	1			2	1	1	1	1	1			2	2	1	1	1	1			5	2.5	2.5	2	2	2
			1	1	1	1	1	1			2	1	1	1	1	1			3	2	1	1	1	1			2	1	1	1	1	1			4	3	2	1	1	2			4.5	3.5	3	3	3	3
			1	1	1	1	1	1			2	1	1	1	1	1			4	3	2	1	1	2			2	2	1	1	1.5	1.5			3	3	2	2	2	2			5	5	4	3	4	5
			1	1	1	1	1	1			1	1	1	1	1	1			2	2	1	1	1	1			2	1	1	1	1	1			3	3	2	1	1	2			4.5	5	4	3	3	3
			1	1	1	1	1	1			2	1	1	1	1	1			2	1	1	1	1	1			1	1	1	1	1	1			3	2	2	2	2	3			4	4	4	3	3	4
			1	1	1	1	1	1			1	1	1	1	1	1			2	2	1	1	1	1			3	2	1	1	1	2			3	2	1.5	1	1	2			4.5	4.5	3	2	3	3.5
			1	1	1	1	1	1			2	1	1	1	1	1			3	2	1	1	1	2			1.5	1.5	1.5	1	1	1.5			2	2	1	1	1.5	2			3	3	2	2	2	3
			1	1	1	1	1	1			1	1	1	1	1	1			2	1.5	1	1	1	1			1	1	1	1	1	1			1	2	1	1	1	1			3	3	2	2	2	3
			1	1	1	1	1	1			1	1	1	1	1	1			2	2	1	1	1	1			1.5	2	1	1	1	1			3	3.5	2	1	1	2			4	4	3	2	3	3
			1	1	1	1	1	1			2	2	1	1	1	1			2.5	2	1	1	1	2			1	1	1	1	1	1			1	1	1	1	1	1			3.5	3.5	2.5	2	2.5	3
			1	1	1	1	1	1			2.5	2	1	1	1	2			3	2.5	2	1	1	2			1.5	1	1	1	1	1			4	3	2	1	2	2			4	4	3	3	3	4
			1	1	1	1	1	1			1.5	1	1	1	1	1			3	2	1.5	1	1	2			2	2	1	1	1	2			3	3.5	2	1.5	2	2.5			5	4	3	3	3	4
			1	1	1	1	1	1			2	1	1	1	1	1			2	1.5	1	1	1	1.5			1.5	1	1	1	1	1			2	1	1	1	1	1			5	4.5	3.5	2	3	3
			1	1	1	1	1	1			1	1	1	1	1	1			2	1	1.5	1	1	2			2	1	1	1	1	1			2	1.5	1	1	1.5	2			4	4	4	3.5	3.5	3.5
			1	1	1	1	1	1			1	1	1	1	1	1			2	1.5	1	1	1	1			3	2	1	1	1	1			2	2	2	1	1	1			5	5	4	3	3.5	4

## Sheet: polyp size
	Polyp size and volume
			size									volume
			IMR HI	IDOSE HI	FBP HI	IMR LO	IDOSE LO	FBP LO				IMR HI	IDOSE HI	FBP HI	IMR LO	IDOSE LO	FBP LO
		polyp	8.5	8.4	8.3	9.7	8.7	7.9			polyp	128	125	127	86	86	91
		polyp	8.6	8.9	9.8	7.4	8.4	8.4			polyp	76	105	108	84	84	66
		polyp	7.5	8.1	7.6	7.3	8.4	7.5			polyp	38	36	33	32	37	34
		polyp	7.5	8.1	8.2	8.7	7.4	8.5			polyp	28	19	19	22	18	19
		polyp	6.4	6.4	6.4	6.4	6.4	6.5			polyp	46	46	48	46	46	19
		polyp	9.8	9.4	8.6	6.8	6.6	6.8			polyp	39	38	43	24	28	24
		polyp	8.1	8.9	8.2	8.9	8.9	9.1			polyp	39	38	35	36	38	24
		polyp	7.9	8.2	8.1	7.1	7.2	7.5			polyp	36	37	37	31	33	32
		polyp	12.4	11.8	13	14.6	14.1	12.2			polyp	490	493	511	420	407	468
		polyp	11.6	9.1	9	11.1	10.2	9.8			polyp	72	26	28	73	63	68
		polyp	6.5	6.9	7.2	7.2	6	5.7			polyp	14	12	13	13.4	12	31
		polyp	6.3	6.4	6.9	6.6	7.5	5.8			polyp	16	16	19	10	20	16
		polyp	10.1	10.4	10.5	10.3	8.8	11.3			polyp	21	24	18	18	17	28
		polyp	8.9	8.9	10.4	9.9	8.9	9.3			polyp	115	138	17	17	25	31
		polyp	6.8	6.2	6.4	6	6	7.4			polyp	27	26	25	35	25	23
		polyp	6.3	6.5	6	6	7.7	7.3			polyp	12.2	8	8	15	13	23
		polyp	6.9	7.4	7.5	7.4	7.6	7.1			polyp	37	39	31	31	35	36
		polyp	5	4.5	4.3	6	4.9	11.3			polyp	36	38	28	25	33	35
		polyp	8.8	7.4	8.1	8.3	8.2	8.4			polyp	23	25	26	28	39	45
		polyp	6.2	7.8	6.6	5.2	7	6.3			polyp	68	78	72	62	62	67
		polyp	6.4	6.8	6.8	6	6.7	8.8			polyp	75	83	77	72	72	75
		polyp	10.1	9.8	9.4	9.5	10.8	10.1			polyp	40.2	43	42	36	36	40
		polyp	9.8	9.8	9.6	9	10.8	11.1			polyp	24	24	24	24	25	20
		polyp	9	10	9.5	9.8	10.6	10			polyp	325	327	334	297	283	271
		polyp	8.7	8.7	8.7	8.7	8.2	8.2			polyp	100	89	91	86	82	103
		polyp	11.2	11.7	11.6	12.1	12	10.5			polyp	211	184	183	148	173	208
		polyp	10.8	10	11	10.6	12.1	9.2			polyp	205	203	211	188	196	212
		polyp	11.9	11.8	11.7	10.6	12.2	12.2			polyp	130	128	140	132	137	131
		polyp	12.1	12	12.1	12.2	12.2	13.3			polyp	137	123	124	126	105	117
		polyp	19	18	19	20	22	21			polyp	21	21	20	18	24	19
		polyp	17	16	16	15	19.2	18			polyp	28	23	23	33	32	22
		polyp	11.1	10.9	10.9	11.6	11.3	11.4			polyp	15	17	18	33	32	22
		polyp	9.3	9.3	9.3	9.4	9.3	10.1			polyp	20	13	18	194	190	189
		polyp	7.7	7.6	7.5	7.2	7.5	7.1			polyp	125	119	127	127	129	140
		polyp	7.3	6.9	6.9	7.2	8.2	7.1			polyp	73	72	72	41	64	69
		polyp	5.9	6.4	6.4	6.4	8.1	7.3			polyp	84	84	84	102	102	125
		polyp	6.7	6.2	6.8	7.5	8.2	8.6			polyp	61	61	62	105	105	29
		polyp	9.2	7.1	8.4	6.4	8.1	7.3			polyp	16	13	15	105	105	29
		polyp	8.5	8.8	8.3	7.5	8.2	8.6			polyp	41	39	47	33	32	33
		polyp	8.3	8.3	8.4	11.8	11.8	12.6			polyp	39	36	37	33	32	33
		polyp	9.8	9.8	9.6	11	11	9.2			polyp	105	156	65	194	190	189
		polyp	6.8	6.8	6.5	7	6.9	6.6			polyp	90	128	129	124	111	107
		polyp	18	17	16.5	18.3	19.2	17			polyp	57	130	117	127	122	173
		polyp	14.4	14.6	15.8	14.5	14	14.8			polyp	109	113	113	107	110	115
		polyp	6.3	6.8	7.2	7	6.9	6.6			polyp	78	69	70	80	66	70
		polyp	8.5	8.4	8.5	11.5	11.2	12.4			polyp	27	22	21	29	26	26
		polyp	13.6	14.3	12.9	16	16	16.6			polyp	26	23	20	29	20	26
		polyp	10.9	10.6	10.7	11.4	12.3	11			polyp	32	36	27	25	28	27
		polyp	9.1	11.8	10.9	11.5	11.2	12.4			polyp	36	46	45	60	42	47
		polyp	7.6	7.7	7.7	7.9	8	7.9			polyp	34	34	66	85	53	98
		polyp	8.8	8.4	8.8	8.8	8.9	8.4			polyp	34	26	26	26	53	98
		polyp	5.9	5.6	5.3	7	7	6.3			polyp	50	42	45	44	44	47
		polyp	6.2	6.5	6.9	6	6.7	5.8			polyp	113	145	99	95	95	90
		polyp	8.9	9.3	8.9	8.5	9	8.2			polyp	33	38	33	34	95	90
		polyp	9.1	10.2	10.2	11.5	9.5	8.1			polyp	62	67	63	47	65	47
		polyp	8.9	9.9	10.3	12	8.8	9.5			polyp	30	27	25	33	28	28
		polyp	8.3	8.3	8.4	8.4	8.4	8
		polyp	9.8	10.3	9.1	9.1	6.8	5.8
		polyp	8.3	7	6.9	7.9	7.9	7.7
		polyp	7.1	9.1	7.6	8.5	8.5	8
		polyp	7.8	8.3	7.8	9.2	9	8.7
		polyp	7.5	7.2	7.3	7.4	7.9	7.8
		tumor/flat	28	29	25	26	27	22
		tumor/flat	26	26	26	27	26	26
		tumor/flat	42	41	39	38	39	41
		tumor/flat	27	27	27	30	29	12.2
		tumor/flat	24	26	26	25	26
		tumor/flat	45	42	39	38	42	46
		tumor/flat	52	53	52	54	59	54
		tumor/flat	41	42	42	30	34	36
		tumor/flat	38	39	39	33	35	38
		tumor/flat	7.5	7.2	7.3	7.4	7.9	7.8

## Sheet: colonic findings
	Colonic findings
					IMR HI	IDOSE HI	FBP HI	IMR LO	IDOSE LO	FBP LO
				fn	0	0	0	1	1	7
				fp	0	0	0	1	2	6
				y	44	44	44	43	43	37
																																								r
																																												2
				segment	IMR HI	IDOSE HI	FBP HI	IMR LO	IDOSE LO	FBP LO																																	2
				s	y	y	y	y	y	y																															1	2	3
				c	y	y	y	y	y	y
				a				fp	fp	fp
				t	y	y	y	y	y	y
				t	y	y	y	y	y	y
				s	y	y	y	y	y	y
				s	y	y	y	y	y	y
				s						fp
				c	y	y	y	y	y	fn
				s	y	y	y	y	y	y
				c	y	y	y	y	y	y
				s	y	y	y	y	y	y
				t	y	y	y	y	y	y
				s						fp
				s	y	y	y	y	y	fn
				t	y	y	y	y	y	y
				r	y	y	y	y	y	y
				d	y	y	y	y	y	y
				d	y	y	y	y	y	fn
				c	y	y	y	y	y	fn
				s	y	y	y	y	y	y
				s	y	y	y	y	y	y
				a	y	y	y	y	y	y
				r	y	y	y	y	y	y
				d						fp
				t	y	y	y	y	y	y
				s	y	y	y	y	y	y
				s	y	y	y	y	y	y
				s	y	y	y	y	y	y
				r	y	y	y	y	y	y
				r	y	y	y	y	y	fn
				s	y	y	y	y	y	y
				r	y	y	y	y	y	y
				t	y	y	y	y	y	y
				a	y	y	y	y	y	y
				a	y	y	y	fn	fn	fn
				s	y	y	y	y	y	y
				s	y	y	y	y	y	y
				t	y	y	y	y	y	y
				s	y	y	y	y	y	y
				t	y	y	y	y	y	y
				s	y	y	y	y	y	y
				a	y	y	y	y	y	y
				t	y	y	y	y	y	y
				a	y	y	y	y	y	y
				a					fp	fp
				d	y	y	y	y	y	y
				t	y	y	y	y	y	y
				d						fp
				r	y	y	y	y	y	fn

## Sheet: extracolonic findings
	Extracolonic findings by C-RADS
			Diverticulosis (pts)	42	42	42	42	42	42
				E2										E3										E4
				MBIR HI	HIR HI	FBP HI	MBIR LO	HIR LO	FBP LO					MBIR HI	HIR HI	FBP HI	MBIR LO	HIR LO	FBP LO					MBIR HI	HIR HI	FBP HI	MBIR LO	HIR LO	FBP LO
				5	5	5	5	4	2					2	2	2	2	2	1					1	1	1	1	0	0
				2	1	1	0	0	1					1	1	1	1	1	0					0	0	0	0	0	0
				7	5	3	3	0	0					0	0	0	0	0	0					0	0	0	0	0	0
				1	1	0	1	1	0					0	0	0	0	0	0					0	0	0	0	0	0
				2	2	2	2	2	2					0	0	0	0	0	0					0	0	0	0	0	0
				3	2	2	2	2	2					0	0	0	0	0	0					0	0	0	0	0	0
				0	0	0	0	0	0					0	0	0	0	0	0					0	0	0	0	0	0
				4	4	3	4	3	3					0	0	0	0	0	0					0	0	0	0	0	0
				2	2	2	2	2	2					1	1	1	1	0	0					1	1	1	1	1	1
				3	3	3	3	3	3					0	0	0	0	0	0					0	0	0	0	0	1
				2	2	2	2	2	1					0	0	0	1	0	0					1	1	1	0	0	0
				4	4	2	4	2	2					0	0	0	0	0	0					0	0	2	0	2	2
				1	1	1	1	1	1					1	1	1	0	0	0					0	0	0	0	0	0
				2	2	2	2	2	1					0	0	0	0	0	0					0	0	0	0	0	0
				3	3	3	3	3	2					0	0	0	0	0	0					0	0	0	0	0	0
				0	0	0	0	0	0					2	2	2	2	2	2					5	5	5	5	5	3
				3	3	3	3	3	0					0	0	0	0	0	0					1	1	1	1	1	0
				1	1	1	1	1	0					0	0	0	0	0	0					0	0	0	0	0	0
				1	1	1	1	1	1					0	0	0	0	0	0					0	0	0	0	0	0
				7	7	7	7	6	2					0	0	0	0	0	3					0	0	0	0	0	0
				2	2	2	2	1	1					0	0	0	0	0	0					0	0	0	0	0	0
				3	3	3	3	2	1					0	0	0	0	0	0					0	0	0	0	0	0
				3	3	3	3	2	2					0	0	0	0	0	0					0	0	0	0	0	0
				1	1	1	0	0	0					0	0	0	0	0	0					0	0	0	0	0	0
				4	4	4	4	3	2					2	2	1	1	1	0					0	0	0	0	0	0
				1	1	1	1	1	1					0	0	0	0	0	0					0	0	0	0	0	0
				1	1	1	1	1	1					0	0	0	0	0	0					0	0	0	0	0	0
				2	2	2	2	2	2					1	1	1	1	1	1					0	0	0	0	0	0
				0	0	0	0	0	0					1	1	1	1	1	1					0	0	0	0	0	0
				3	3	3	3	3	3					0	0	0	0	0	0					0	0	0	0	0	0
				3	3	3	3	3	3					1	1	1	1	1	1					0	0	0	0	0	0
				0	0	0	0	0	0					0	0	0	0	0	0					0	0	0	0	0	0
				3	3	3	3	3	3					0	0	0	0	0	0					0	0	0	0	0	0
				3	3	3	3	3	3					0	0	0	0	0	0					0	0	0	0	0	0
				5	5	5	5	3	2					1	1	1	1	1	1					0	0	0	0	0	0
				2	2	2	2	2	2					0	0	0	0	0	0					0	0	0	0	0	0
				2	2	2	2	2	2					0	0	0	0	0	0					0	0	0	0	0	0
				3	3	3	3	3	3					0	0	0	0	0	0					0	0	0	0	0	0
				1	1	1	1	1	1					0	0	0	0	0	0					0	0	0	0	0	0
				2	2	2	1	1	0					0	0	0	0	0	0					0	0	0	0	0	0
				0	0	0	0	0	0					0	0	0	0	0	0					0	0	0	0	0	0
				1	1	1	1	0	0					0	0	0	0	0	0					0	0	0	0	0	0
				2	2	2	2	2	1					1	1	1	1	0	0					0	0	0	0	0	0
				3	3	3	3	2	2					0	0	0	0	0	0					0	0	0	0	0	0
				0	0	0	0	0	0					0	0	0	0	0	0					0	0	0	0	0	0
				5	5	5	5	5	5					1	1	1	1	1	1					0	0	0	0	0	0
				3	3	3	3	1	0					1	1	1	1	1	0					1	1	1	1	1	1
				1	1	1	1	1	1					0	0	0	0	0	0					0	0	0	0	0	0
				4	4	4	4	4	3					0	0	0	0	0	0					0	0	0	0	0	0
				3	2	2	2	2	2					0	0	0	0	0	0					0	0	0	0	0	0
				1	1	1	1	1	1					1	1	1	1	1	1					0	0	0	0	0	0
				3	2	2	2	1	1					1	1	1	1	1	1					0	0	0	0	0	0
				3	3	3	3	3	3					0	0	0	0	0	0					0	0	0	0	0	0
				3	3	3	3	3	2					0	0	0	0	0	0					0	0	0	0	0	0
				0	0	0	0	0	0					0	0	0	0	0	0					0	0	0	0	0	0
				4	4	4	3	3	3					0	0	0	0	0	0					0	0	0	0	0	0
				1	1	1	1	1	1					1	1	1	1	1	1					0	0	0	0	0	0
				0	0	0	0	0	0					0	0	0	0	0	0					0	0	0	0	0	0
				1	1	1	1	1	1					0	0	0	0	0	0					0	0	0	0	0	0
				2	2	2	2	0	0					1	1	1	1	1	1					0	0	0	0	0	0
				2	2	2	2	2	2					0	0	0	0	0	0					0	0	0	0	0	0
				0	0	0	0	0	0					1	1	1	1	1	0					0	0	0	0	0	0
				0	0	0	0	0	0					2	2	2	2	2	2					1	1	1	1	1	1
				2	2	2	2	2	1					0	0	0	0	0	0					0	0	0	0	0	0
